# Supplementary material for: Rapid Leaf Deployment Strategies in a Deciduous Savanna
Source: PLoS One. 2016 Jun 16;11(6):e0157833. doi: 10.1371/journal.pone.0157833 (PMC4911110; doi:10.1371/journal.pone.0157833)
Supplement: S1 Code Listing — " (BUG) [file pone.0157833.s001.bug]

# JAGS model used to derive parameters shown in manuscript Figure 4
# February and Higgins, Rapid leaf deployment strategies in a deciduous savanna.
# PloSONE insert doi

# order refers to twig order
# data is the sampling date
# tree is the indentity of the individual tree sampled

model {

for (i in 1:N){
  Nitrogen[i] ~ dnorm(N.mu[i],tau.N)
  N.mu[i] <- date[i]*slope[order[i]] + pow(date[i],2)*slope2[order[i]] +
             b.tree[tree[i]] + intercept[order[i]]
}


for (p in 1:Ntree)     
{
 b.tree[p] ~ dnorm(0,   pow(0.01,-2))   
}
          
 
for(p in 1:4) 
{ #4 orders
 slope[p]  ~ dnorm(0,  pow(0.05,-2))  
 slope2[p]  ~ dnorm(0,  pow(0.001,-2))  
 intercept[p] ~ dnorm(0,  pow(0.05,-2))  
}
 

sig.N ~  dunif(0.0001,1)
tau.N <- 1/(sig.N*sig.N)

}
